# Supplementary material for: National variation in United States sepsis mortality: a descriptive study
Source: Springer Nature journal article supplement (doi:10.1186/1476-072x-9-9), 2010-01-01

## **APPENDICES**

Wang, et al.: National Variation in United States Sepsis Mortality: a Descriptive Study

Appendices 1A-1D – Age-stratified maps

Appendices 2A-2B – Sex-stratified maps

Appendices 3A-3G – Infection group-stratified maps

**APPENDIX 1A**

Age-stratified regional variation in sepsis-attributed mortality, United States, 1999-2005. Excludes Alaska and Hawaii. Bold borders indicate states where reliable mortality rates could not be calculated.

Ages 15-24:

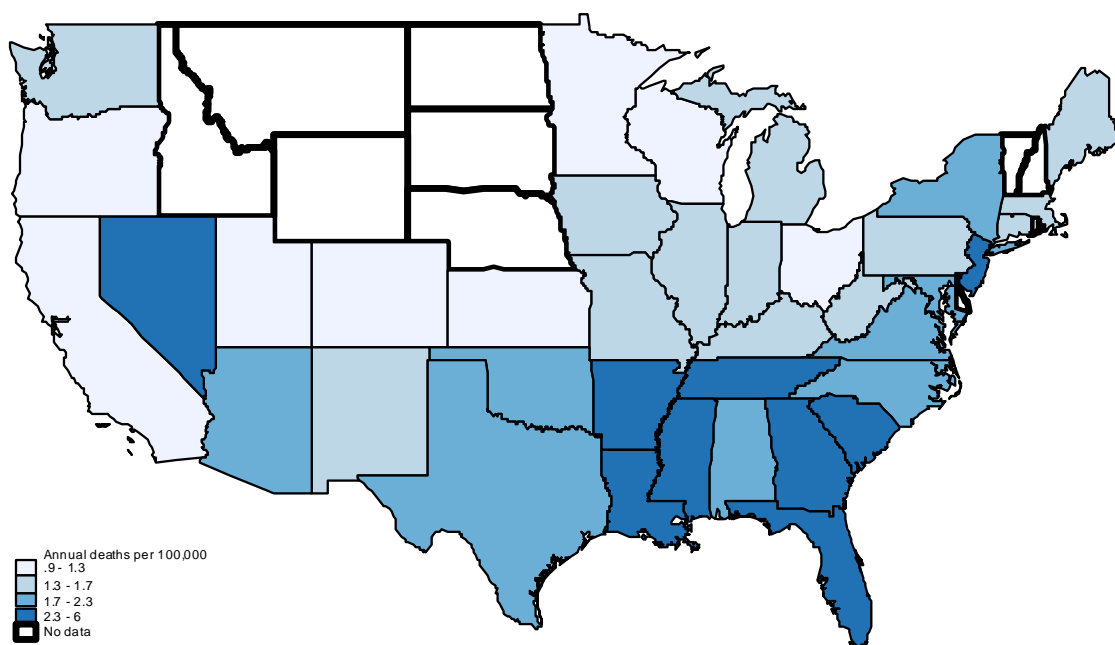

**APPENDIX 1B**

Age-stratified regional variation in sepsis-attributed mortality, United States, 1999-2005. Excludes Alaska and Hawaii.

Ages 25-44:

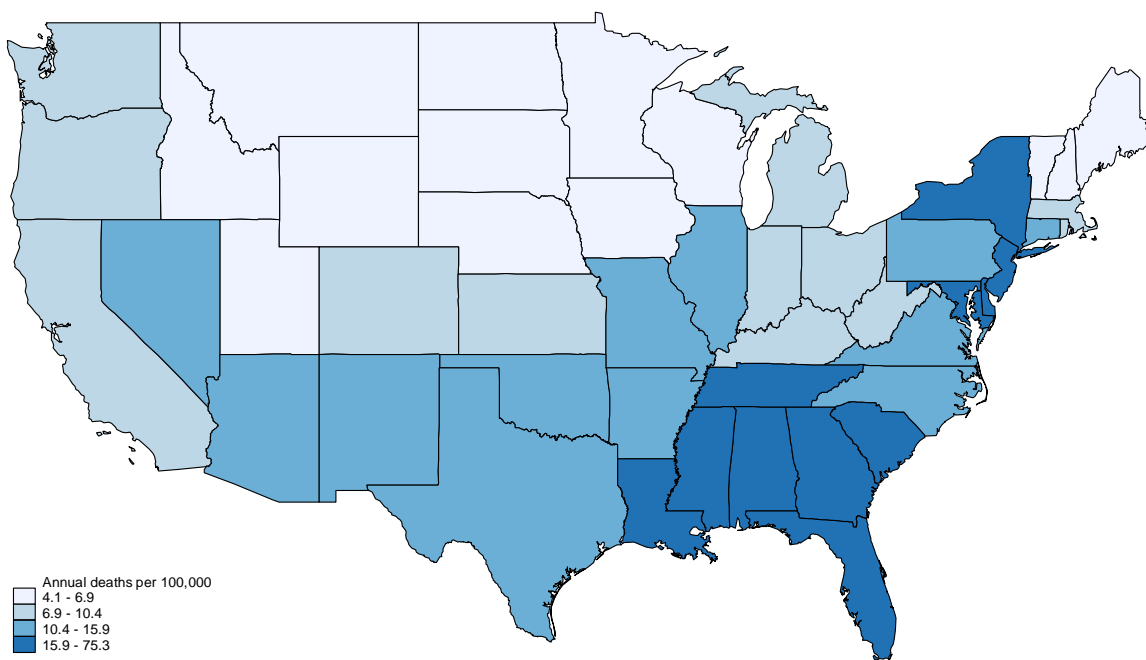

**APPENDIX 1C**

Age-stratified regional variation in sepsis-attributed mortality, United States, 1999-2005. Excludes Alaska and Hawaii.

Ages 45- 64

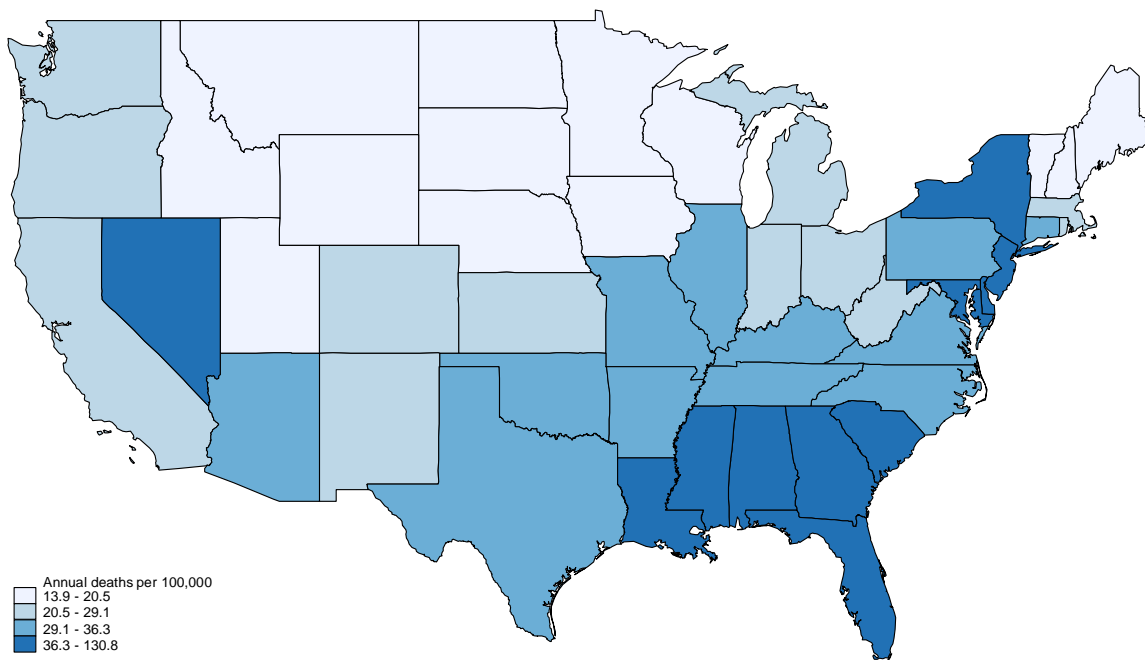

**APPENDIX 1D**

Age-stratified regional variation in sepsis-attributed mortality, United States, 1999-2005. Excludes Alaska and Hawaii.

Age >65:

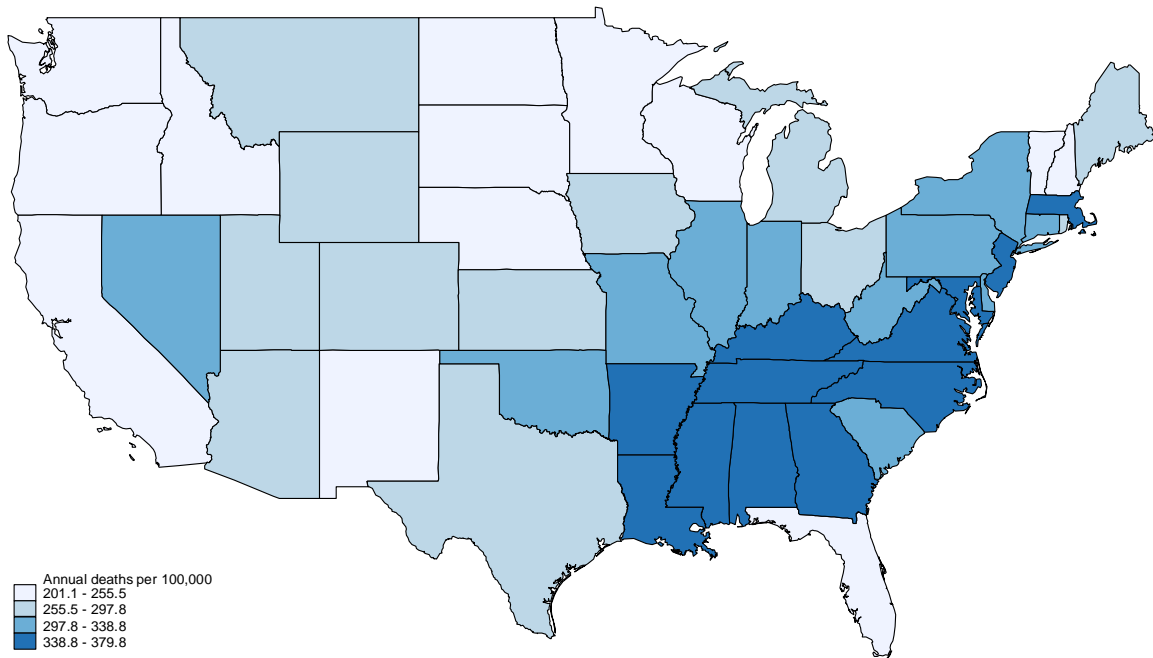

**APPENDIX 2A**

Regional variation in sepsis-attributed mortality, United States, 1999-2005 – males only. Excludes Alaska and Hawaii.

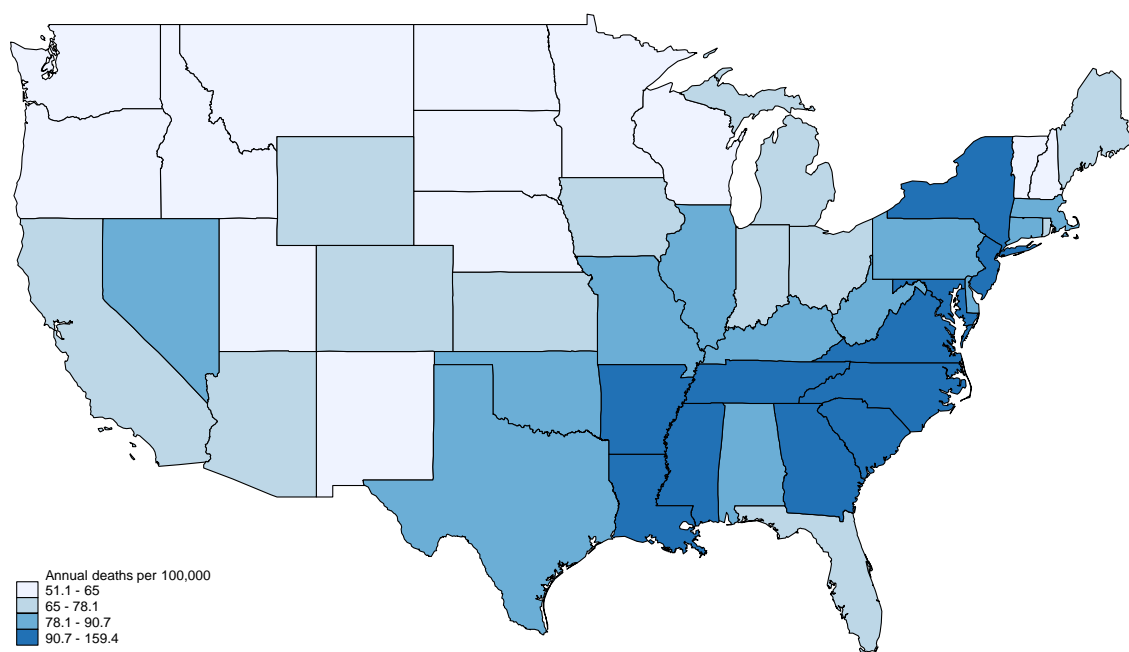

**APPENDIX 2B**

Regional variation in sepsis-attributed mortality, United States, 1999-2005 – females only. Excludes Alaska and Hawaii.

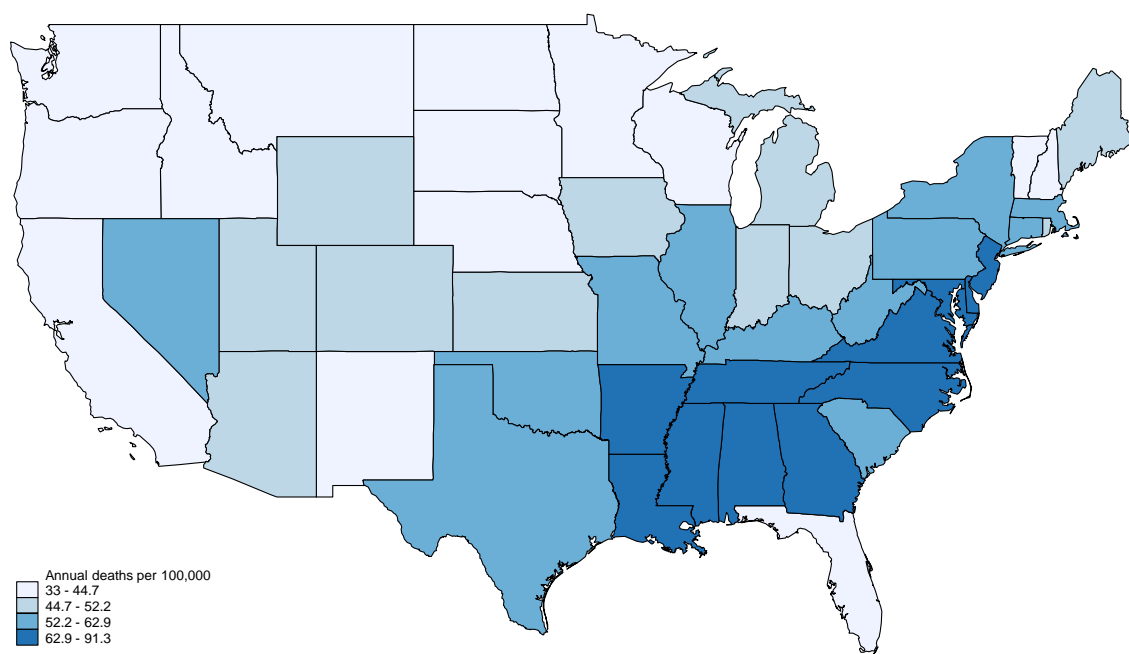

**APPENDIX 3A**

Regional variation in sepsis mortality – respiratory infections only, United States, 1999-2005. Excludes Alaska and Hawaii.

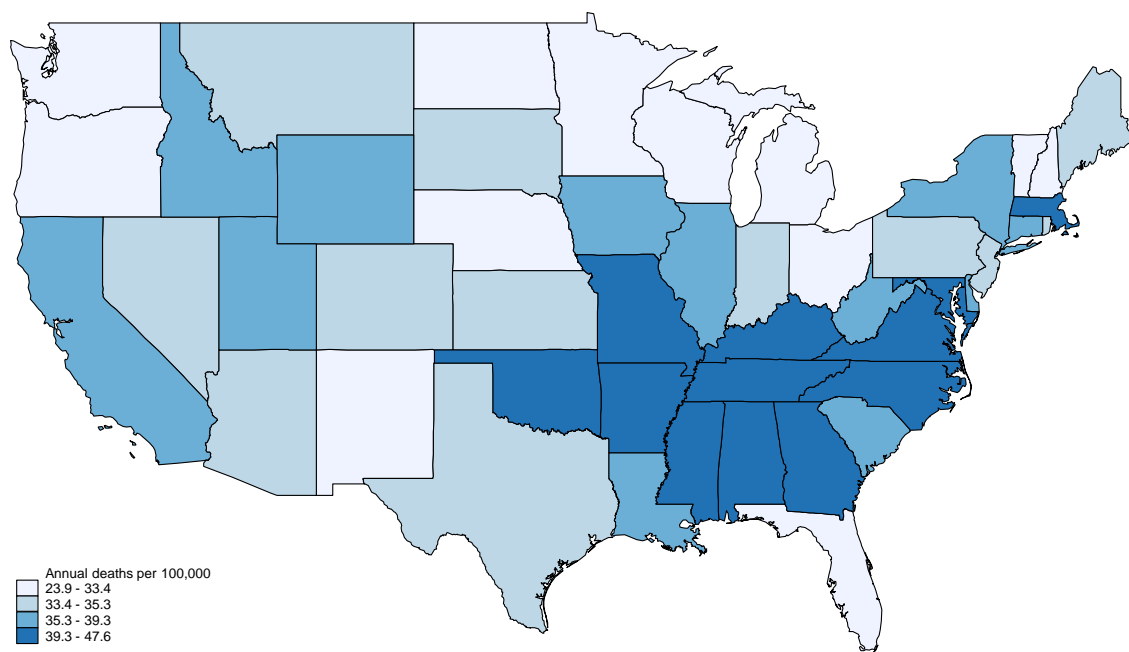

**APPENDIX 3B**

Regional variation in sepsis mortality – septicemia only, United States, 1999-2005. Excludes Alaska and Hawaii.

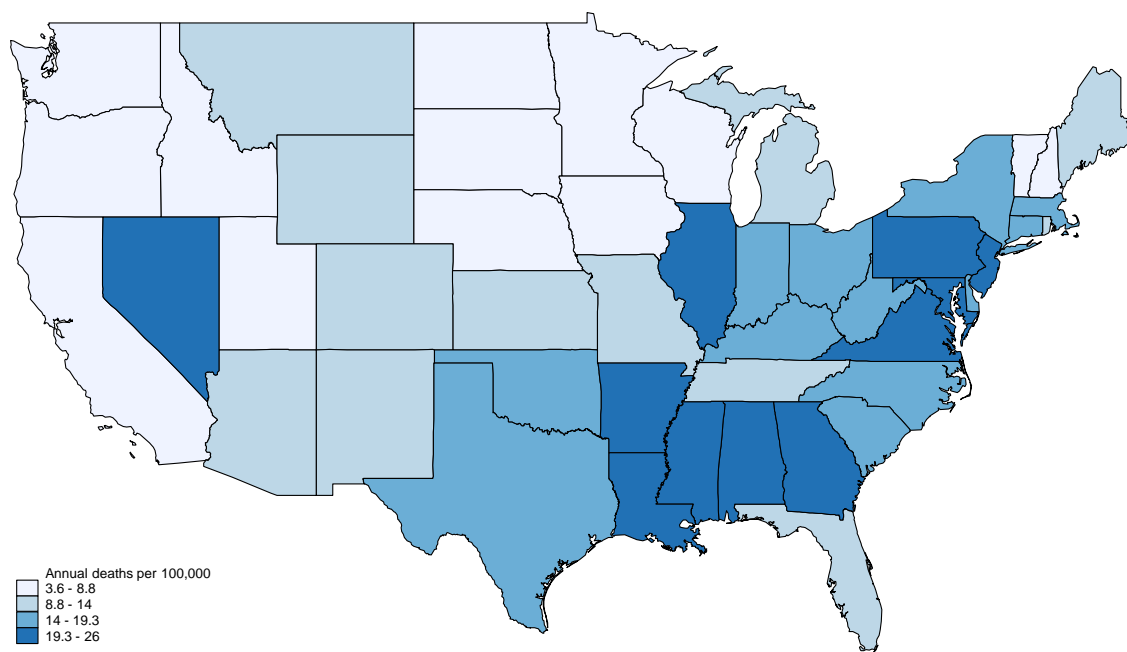



**APPENDIX 3D**

Regional variation in sepsis mortality – kidney/genitourinary infections only, United States, 1999-2005.

Excludes Alaska and Hawaii.

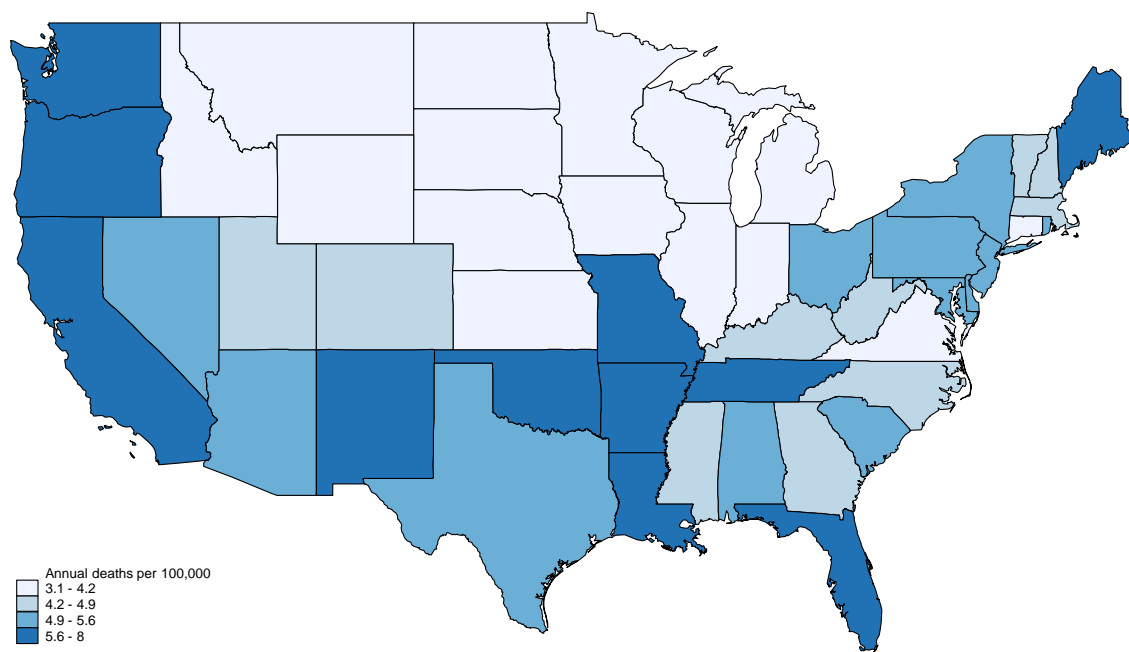

**APPENDIX 3E**

Regional variation in sepsis mortality – cardiac infections only, United States, 1999-2005. Excludes Alaska and Hawaii.

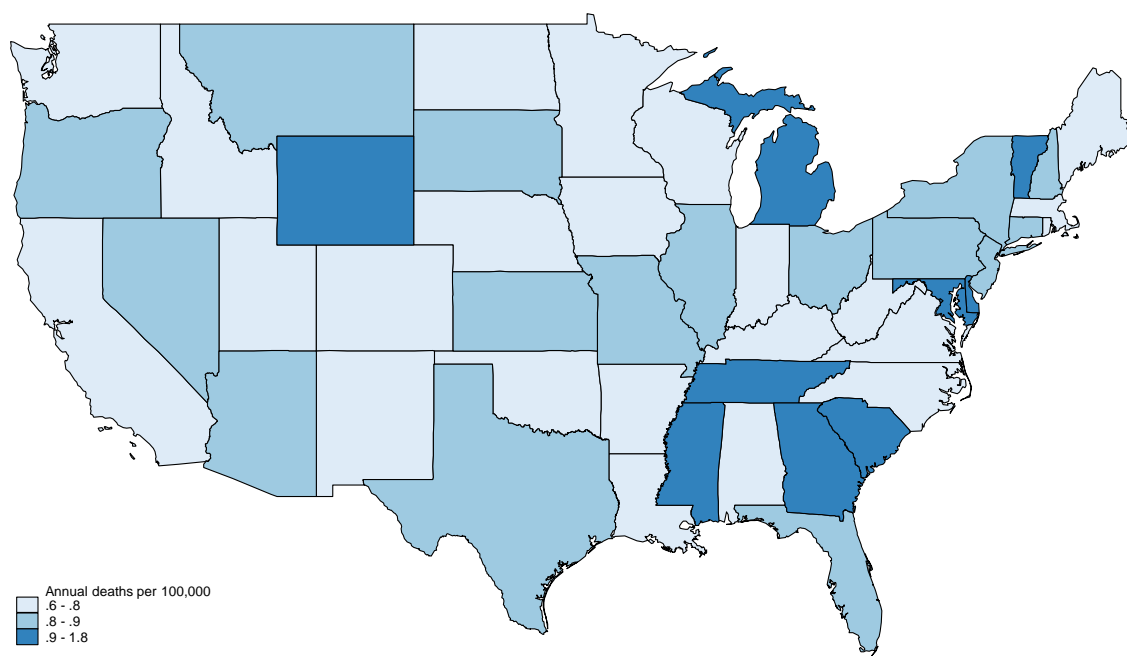

**APPENDIX 3F**

Regional variation in sepsis mortality – neurologic infections only, United States, 1999-2005. Excludes Alaska and Hawaii.

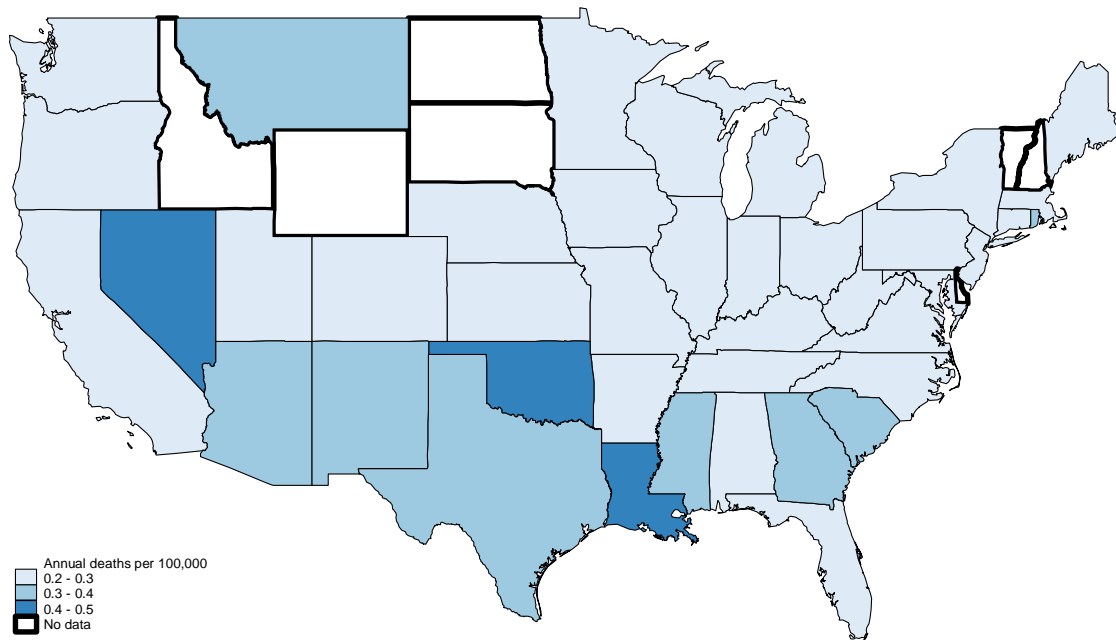

Supplement: Additional file 1 [file 1476-072x-9-9-s1.pdf]
